# Supplementary material
Source: publisher figshare collection journal article supplement (https://asha.figshare.com/ndownloader/files/16412390)
Supplement: Supplementary file 1 [file 16412390]

## Sheet: Windows
Supplemental Material, Deshpande & Shimunova, "A Comprehensive Evaluation of Tinnitus Apps," AJA, https://doi.org/10.1044/2019_AJA-18-0135
Supplemental Material S3. List of tinnitus apps and associated features available on the Windows mobile platform.
Name of the App	Name of the Developer	Free/Paid	Cost	Tinnitus Education, Awareness, and Prevention			Tinnitus Assessment and Measurement													Tinnitus Management
				Tinnitus information	Noise measurement	Hearing test	Pitch				Loudness			Laterality	Type	Timer	Annoyance	Questionnaire	Profile Save	Sound library										Sound library features																		Other features
							Primary	Secondary	Bandwidth	Modulation	Match	Balance	Modulation							Color noise/NBN	Natural/enviromental sounds	Mechanical sounds	Binaural beats	Physiological sounds	Puretones	Anti-phase sounds	Music	Notched stimuli	Breathing/relaxation exercises	Sound record/import	Sound export	Sound combination	Soundscape save	Volume control of individual sounds	Volume control	Volume balance	Pitch control	Pitch modulation	Amplitude modulation	Equalizer	Monaural/binaural presentation	Shuffle	Playlist	Loop playlist	Timer	Usage statistics	Alarm	Mininum masking level	Calibration
Sleep bug	Panzartax	Free																			Present						Present					Present
Relaxiness Rain Sounds	Virege	Free																			Present														Present										Present
Simply White Noise	Purple flux mobile development	Free																		Present																									Present
Relax Rain Sounds	WP developer	Free																			Present						Present					Present			Present										Present
Rain Oh Rain Sleep sounds	Clipin Media	Free																			Present	Present													Present										Present
White noise	Tmsoft	Free																		Present	Present	Present		Present			Present			Present		Present	Present		Present	Present	Present						Present	Present	Present		Present
Night Sounds Relaxing Nature and Ambient Melodies	Mag games	Free																			Present						Present																	Present
Rain Oh Rain Sleep sounds Premium	Clipin Media	Free																			Present	Present		Present											Present										Present
Sleep Pillow	Pixel Lab	Free																			Present						Present						Present	Present	Present										Present
Relaxing Night Sound: Best Soothing Music Therapy and Nature Sounds for Trouble Sleeping	Mag games	Free																			Present																							Present
Nature Sounds and White Noise Maker: Nature Scapes	GamesStudio	Free																			Present
Relaxing Mountain Sound- Relax Nature Melodies for Health and Wellness	Mag games	Free																			Present						Present
Mountain Sound Relax Melodies and Sleep Pillow: Soothing Sound for Relaxation	Mag games	Free																			Present						Present
Mountain Sounds Relax and Sleep: A Mind therapy app	GamesStudio	Free																			Present						Present
Countryside Sound- Relax Melodies for Deep Sleep and Meditation with Sleep Pillow	Mag games	Free																			Present
Countryside Sounds- Relaxing Sounds of Nature	GamesStudio	Free																									Present
Sea Sounds- Music for Deep Sleep	GamesStudio	Free																			Present
Sleep bug Pro	Panzartax	Paid	2.49																		Present	Present					Present					Present													Present
Tinnitus Help	IND-Ingenieurbuero f. Nachrichten- u. Datentechnik	Paid	64.99				Present				Present		Present	Present					Present		Present				Present		Present								Present	Present		Present	Present		Present				Present
Tinnitus Help Prof	IND-Ingenieurbuero f. Nachrichten- u. Datentechnik	Paid	189.99				Present				Present		Present	Present					Present		Present				Present		Present								Present	Present		Present	Present		Present				Present
[truncated: 1 more columns]
